# Supplementary material for: An integrated metabolomics workflow for the quantification of sulfur pathway intermediates employing thiol protection with N-ethyl maleimide and hydrophilic interaction liquid chromatography tandem mass spectrometry
Source: Royal Society of Chemistry journal article supplement (doi:10.1039/c5an01629k), 2015-01-01
Supplement: c5an01629k1.pdf [file c5an01629k1.pdf]

## **An integrated metabolomics workflow for the quantification of sulfur pathway intermediates employing thiol protection with N-ethyl maleimide and hydrophilic interaction liquid chromatography tandem mass spectrometry.**

Karin Ortmayr<sup>a,b</sup>, Michaela Schwaiger<sup>a</sup>, Stephan Hann<sup>b</sup>, Gunda Koellensperger<sup>a,\*</sup>

<sup>a</sup> *Institute of Analytical Chemistry, University of Vienna, Faculty of Chemistry, Waehringer Str. 38, 1090 Vienna, Austria*

<sup>b</sup> *Department of Chemistry, University of Natural Resources and Life Sciences (BOKU) Vienna, Muthgasse 18, 1190 Vienna, Austria*

\* E-mail: [gunda.koellensperger@univie.ac.at](mailto:gunda.koellensperger@univie.ac.at), fax: +43 1 42779523

## **SUPPLEMENTARY INFORMATION**

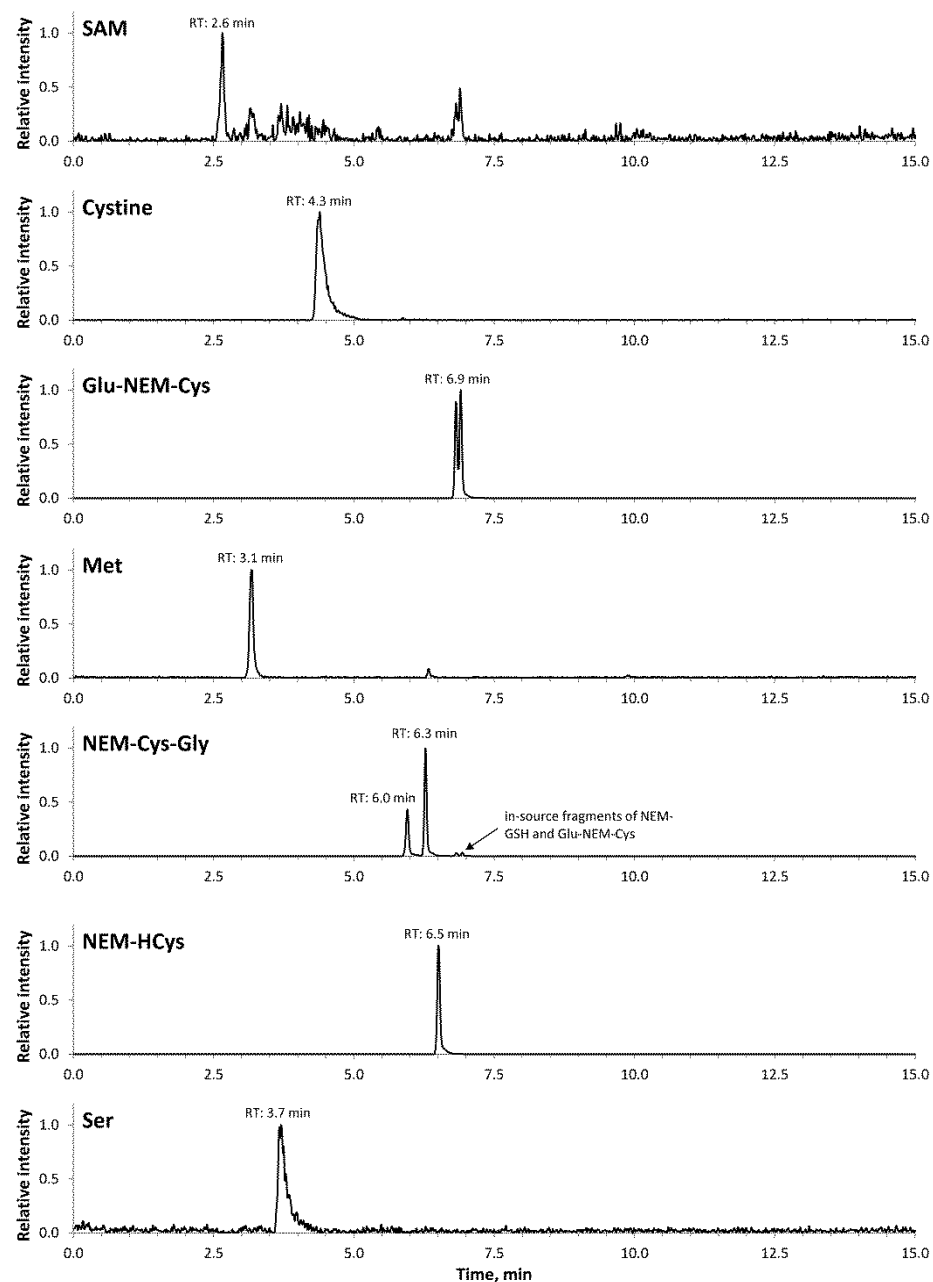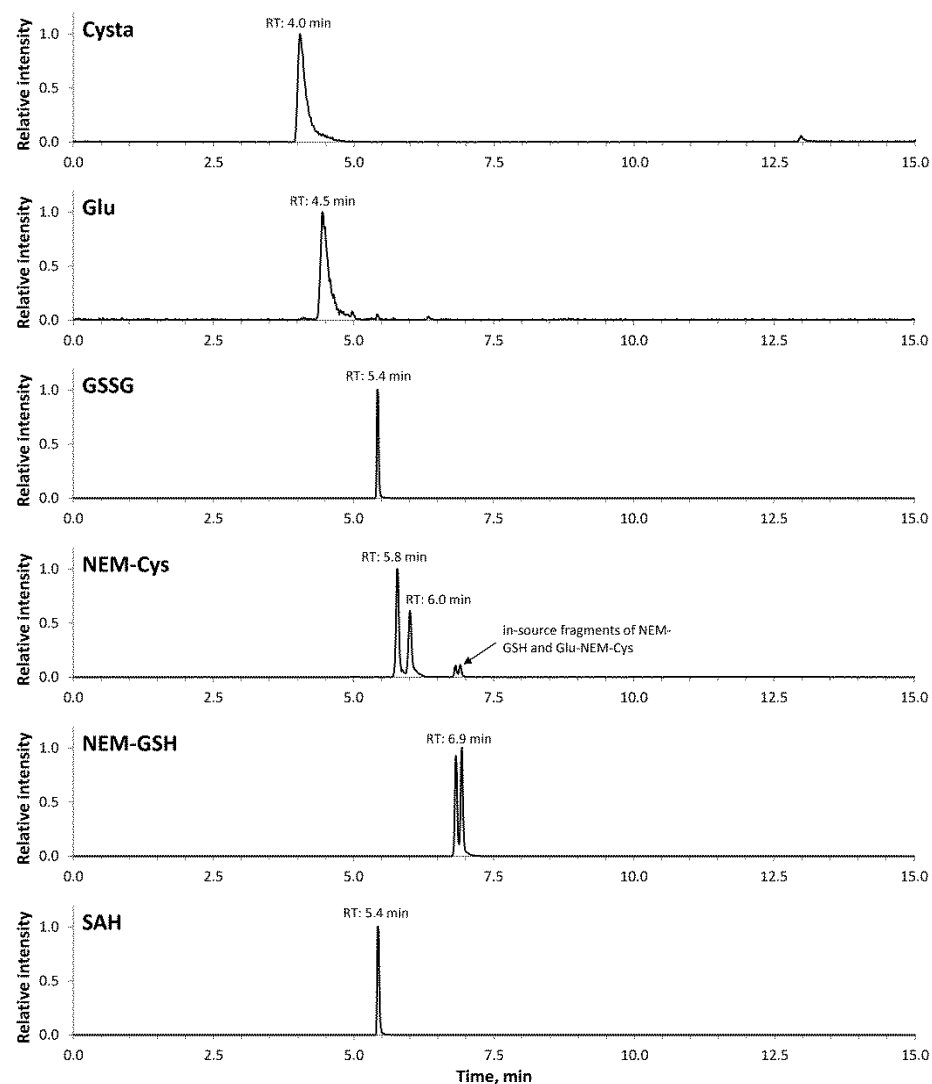

**Figure S1.** Representative chromatograms from RP-PGC-ESI-MS analysis<sup>43</sup> of sulfur metabolic pathway intermediates after NEM derivatization. The sample was prepared from metabolite standards in LC-MS grade water (2.5  $\mu$ M each). Data were acquired on an Agilent 6210 TOF LC-MS system. Extracted ion chromatograms (EIC) were obtained using the exact metabolite masses (Table 1, extraction width  $\pm$  5 ppm).
